# Supplementary material for: Creation of near-infrared luminescent phosphors enabled by topotactic reduction of bismuth-activated red-emitting crystals
Source: Royal Society of Chemistry journal article supplement (doi:10.1039/c6tc03524h), 2016-01-01
Supplement: c6tc03524h1.pdf [file c6tc03524h1.pdf]

## Supporting Information

### Creation of near-infrared luminescent phosphors enabled by topotactic reduction of bismuth-activated red-emitting crystals

Bo-Mei Liu,<sup>a</sup> Zi-Jun Yong,<sup>a</sup> Yang Zhou,<sup>a</sup> Dan-Dan Zhou,<sup>a</sup> Li-Rong Zheng,<sup>b</sup> Li-Na Li,<sup>c</sup> Hui-Mei Yu,<sup>d</sup> and  
Hong-Tao Sun<sup>\*a,e</sup>

<sup>a</sup> College of Chemistry, Chemical Engineering and Materials Science, State and Local Joint Engineering Laboratory for Novel Functional Polymeric Materials, Soochow University, Suzhou 215123, China. Email: timothyhsun@gmail.com

<sup>b</sup> Synchrotron Radiation Facility, Institute of High Energy Physics, Chinese Academy of Sciences, Beijing 100049, China

<sup>c</sup> Synchrotron Radiation Facility, Shanghai Institute of Applied Physics, Chinese Academy of Sciences, Shanghai 201204, China

<sup>d</sup> Shanghai Institute of Ceramics, Chinese Academy of Sciences, Shanghai 200050, China

<sup>e</sup> State Key Laboratory of Luminescent Materials and Devices, South China University of Technology, Guangzhou 510640, China

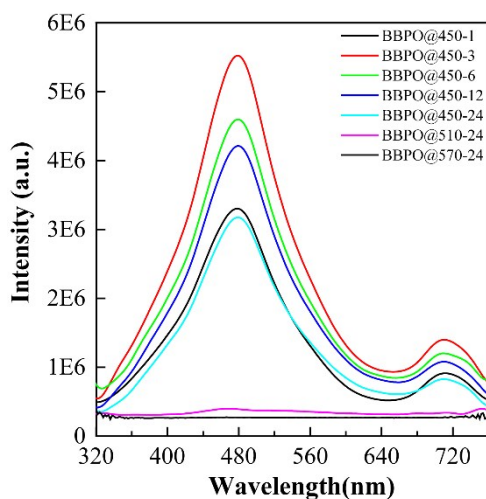

Fig. S1 PL excitation spectrum obtained on Bi-doped BaBPO<sub>5</sub> reduced sample with  $\lambda_{em}=1164\text{nm}$

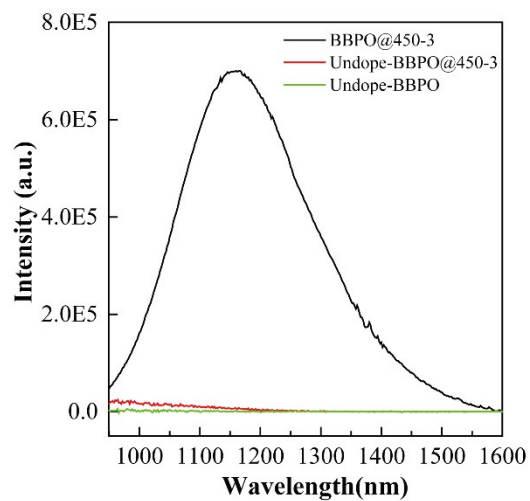

**Fig. S2** PL spectra of the undoped BaBPOs before and after topotactic reduction. The PL spectrum of the BBPO@450-3 taken under the same conditions is shown for comparison.

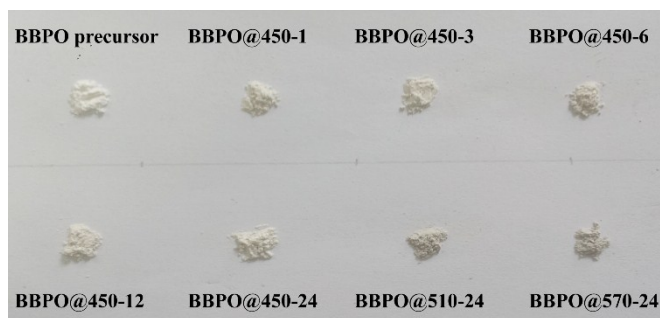

**Fig. S3** Images of the precursor and reduced samples. All images were taken by the same CCD camera.

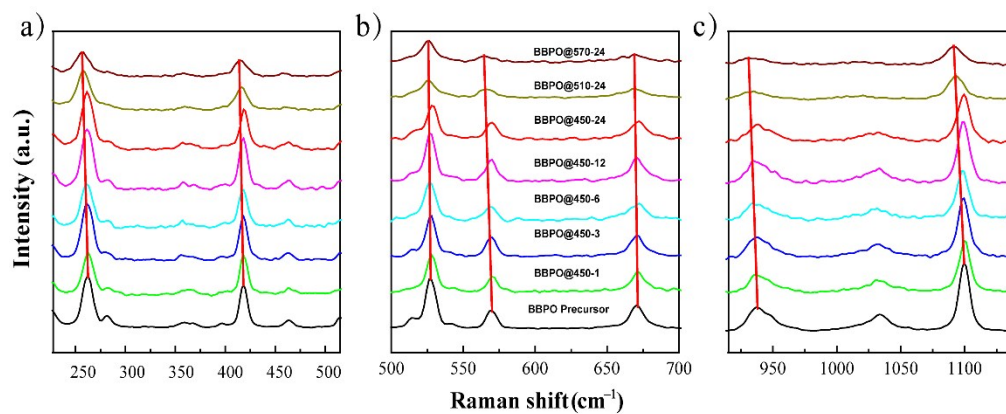

Fig. S4 Enlarged Raman spectra of the precursor and reduced samples.

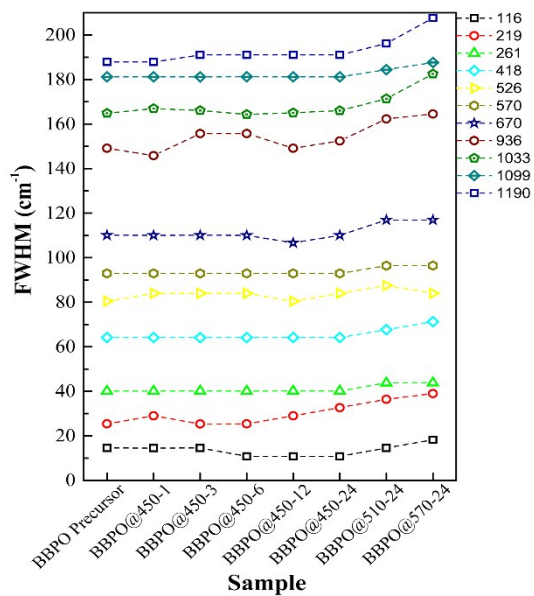

Fig. S5 FWHMs of Raman peaks of the precursor and reduced samples. Note that the scattering peaks at 359,

462 and 745 $\text{cm}^{-1}$  are too weak and their FWHMs are difficult to be determined.

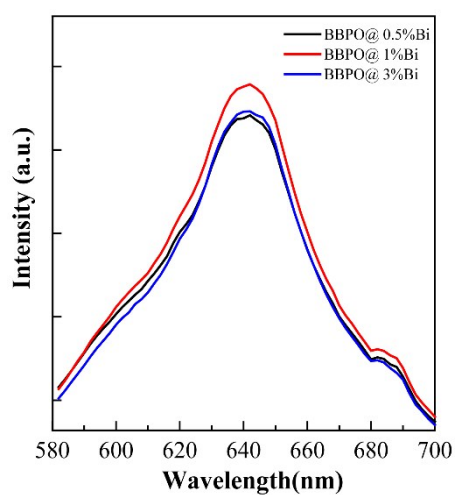

**Fig. S6** Emission spectra of the samples BaBPO<sub>5</sub>@y%Bi (y=0.5, 1.0, 3.0) under 268 nm excitation.

$$\tau_{eff} = \frac{\int_0^{\infty} tI(t)dt}{\int_0^{\infty} I(t)dt}$$

**Table S1.** Effective lifetimes at 1164 nm, calculated by the equation , for the reduced samples.

| Sample        | BBPO@450-1 | BBPO@450-3 | BBPO@450-6 | BBPO@450-12 | BBPO@450-24 | BBPO@510-24 |
|---------------|------------|------------|------------|-------------|-------------|-------------|
| Lifetime (μs) | 94.38      | 88.49      | 82.51      | 81.71       | 84.15       | 115.81      |
